# Supplementary material
Source: PubMed Central journal article supplement (PMC6408883)

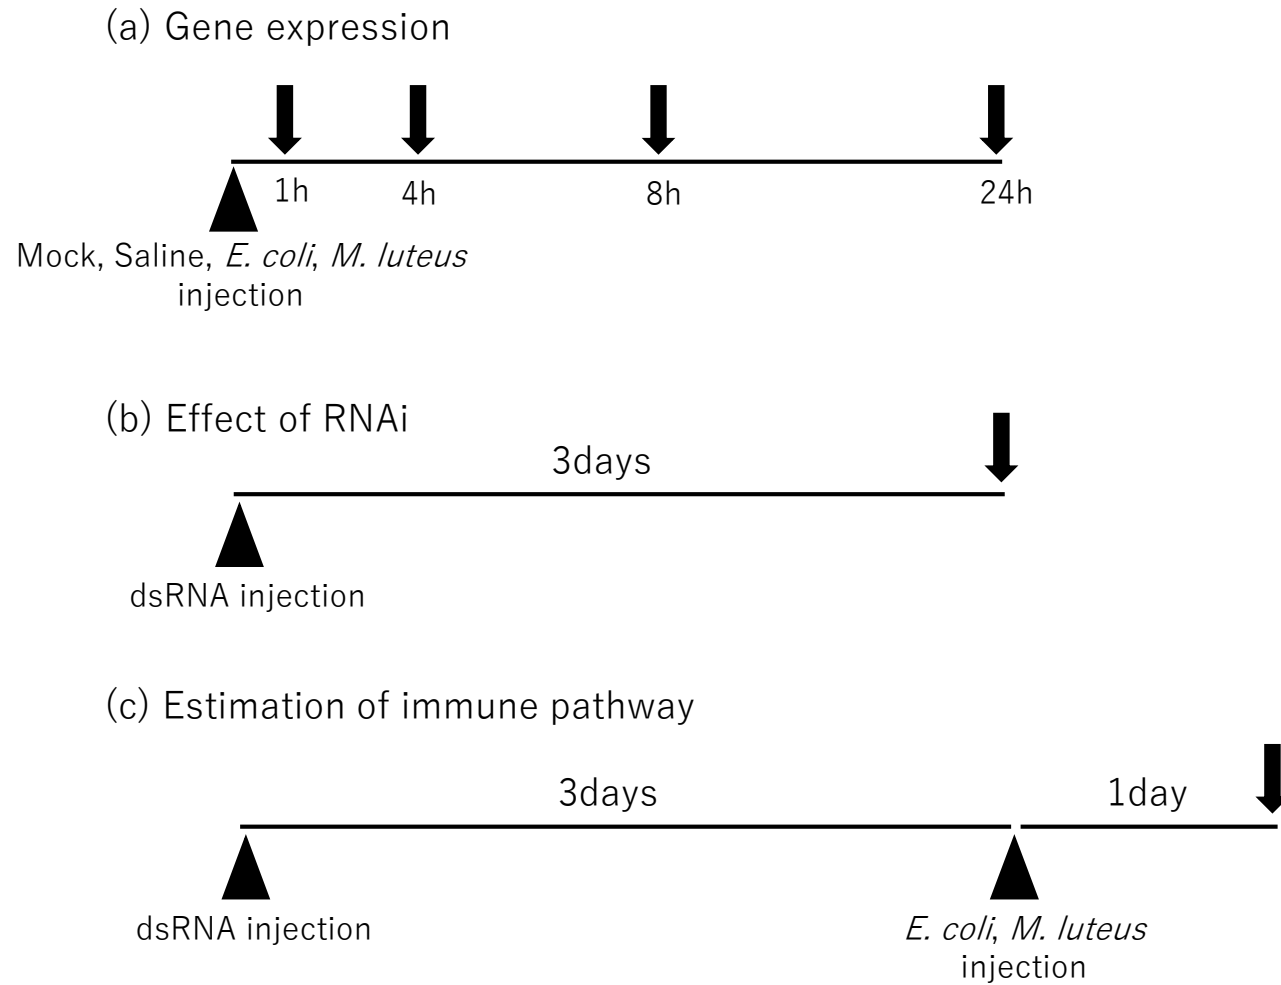

|          | Gene         | Accession number | non-treated | <i>E.coli</i> injected | <i>M. luteus</i> injected |
|----------|--------------|------------------|-------------|------------------------|---------------------------|
| Toll     | spatzle      | LC384118         |             |                        |                           |
|          | Toll         | LC384119         |             |                        |                           |
|          | Myd88        | LC384122         |             |                        |                           |
|          | pelle        | LC384123         |             |                        |                           |
|          | tube         | LC384124         |             |                        |                           |
|          | Traf6        | LC384125         |             |                        |                           |
|          | cactus       | LC384126         |             |                        |                           |
|          | Dorsal-A     | LC384127         |             |                        |                           |
|          | Dorsal-B     | LC384128         |             |                        |                           |
| IMD      | Imd          | LC384129         |             |                        |                           |
|          | FADD         | LC384130         |             |                        |                           |
|          | Relish       | LC384131         |             |                        |                           |
|          | TAK1         | LC384132         |             |                        |                           |
|          | IKK-beta     | LC384133         |             |                        |                           |
| PGRP     | GGBP1        | LC384120         |             |                        |                           |
|          | GGBP2        | LC384121         |             |                        |                           |
|          | PGRP-L1a     | LC384134         |             |                        |                           |
|          | PGRP-L1b     | LC384135         |             |                        |                           |
|          | PGRP-L2      | LC384136         |             |                        |                           |
|          | LysM         | LC384137         |             |                        |                           |
| Lysozyme | Lysozyme_b-1 | LC384138         |             |                        |                           |
|          | Lysozyme_b-2 | LC384139         |             |                        |                           |
|          | Lysozyme_c-1 | LC384140         |             |                        |                           |
|          | Lysozyme_c-2 | LC384141         |             |                        |                           |
|          | Lysozyme_c-3 | LC384142         |             |                        |                           |
|          | Lysozyme_i-1 | LC384143         |             |                        |                           |
| AMP      | Defensin1    | LC384144         |             |                        |                           |
|          | Defensin2    | LC384145         |             |                        |                           |
|          | Hemiptericin | LC384146         |             |                        |                           |

(FPKM)

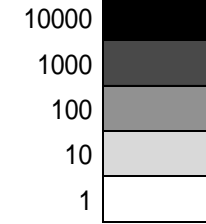

Nishide et al.  
Functional crosstalk across IMD and Toll pathways  
10.1098/rspb.

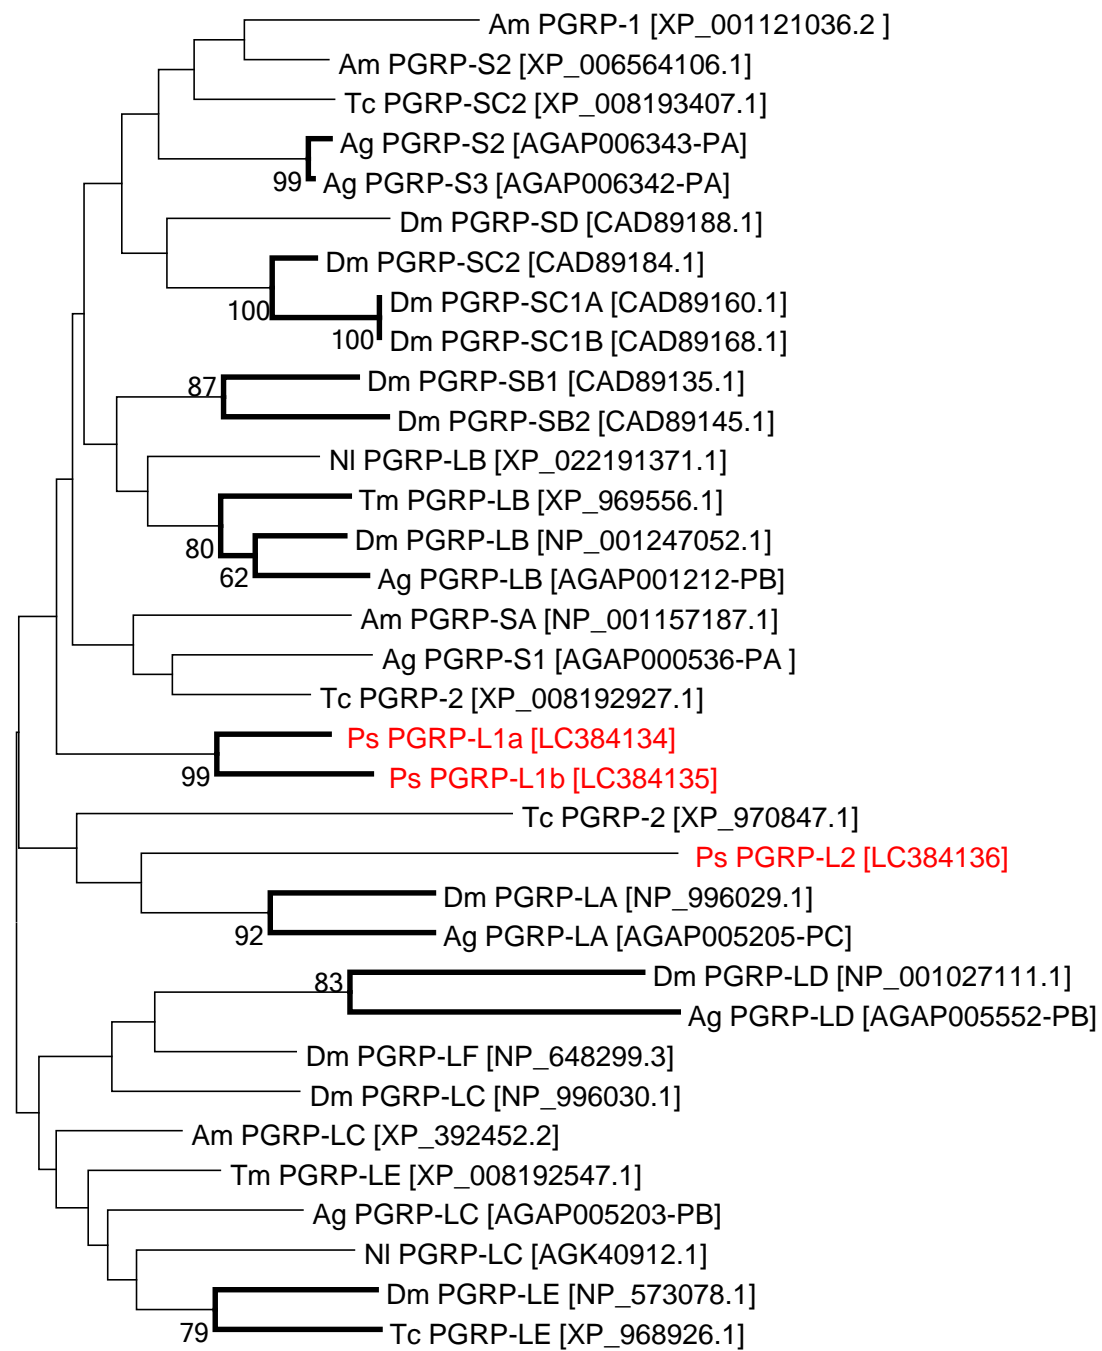

Nishide et al.  
 Functional crosstalk across IMD and Toll pathways  
 10.1098/rspb.

0.20

supFig. 3

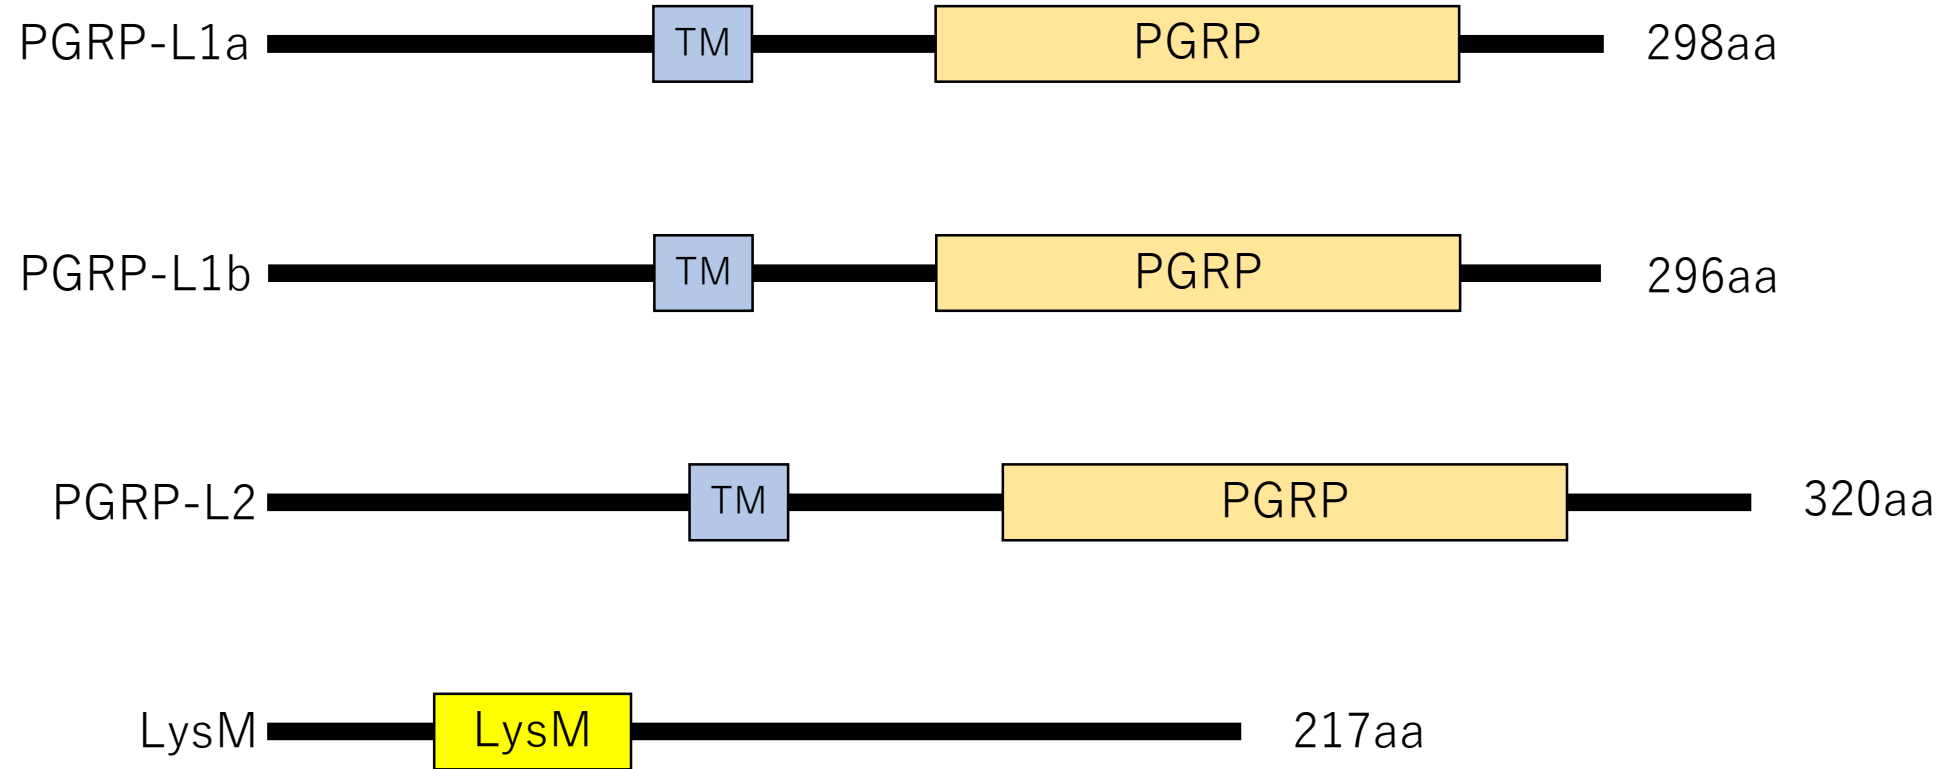

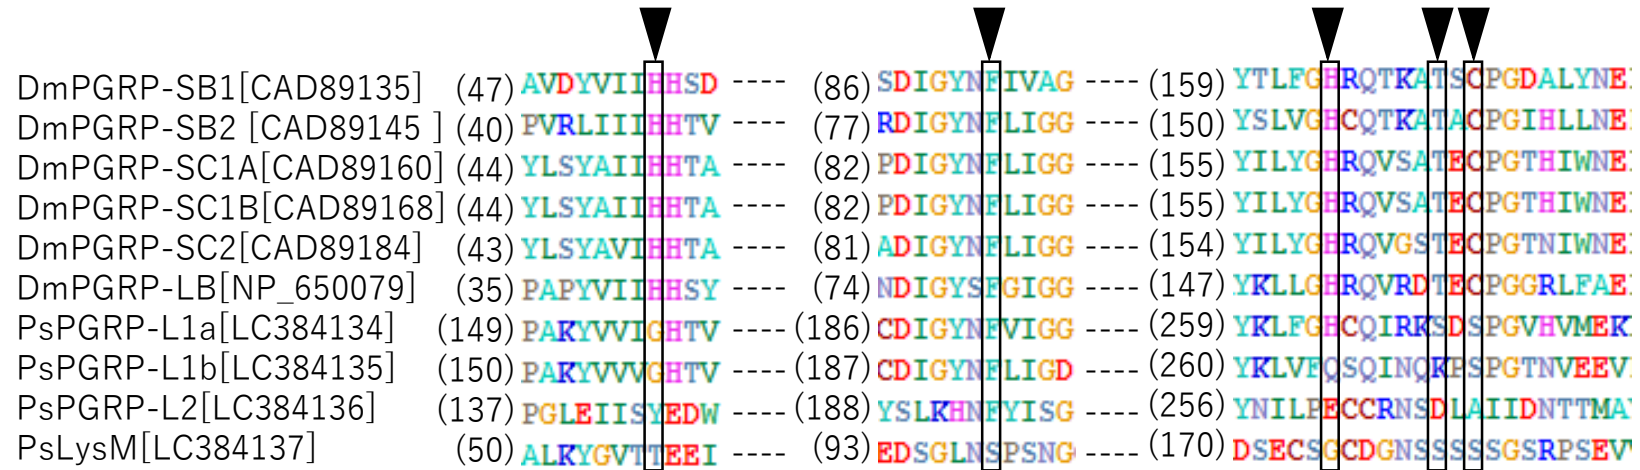

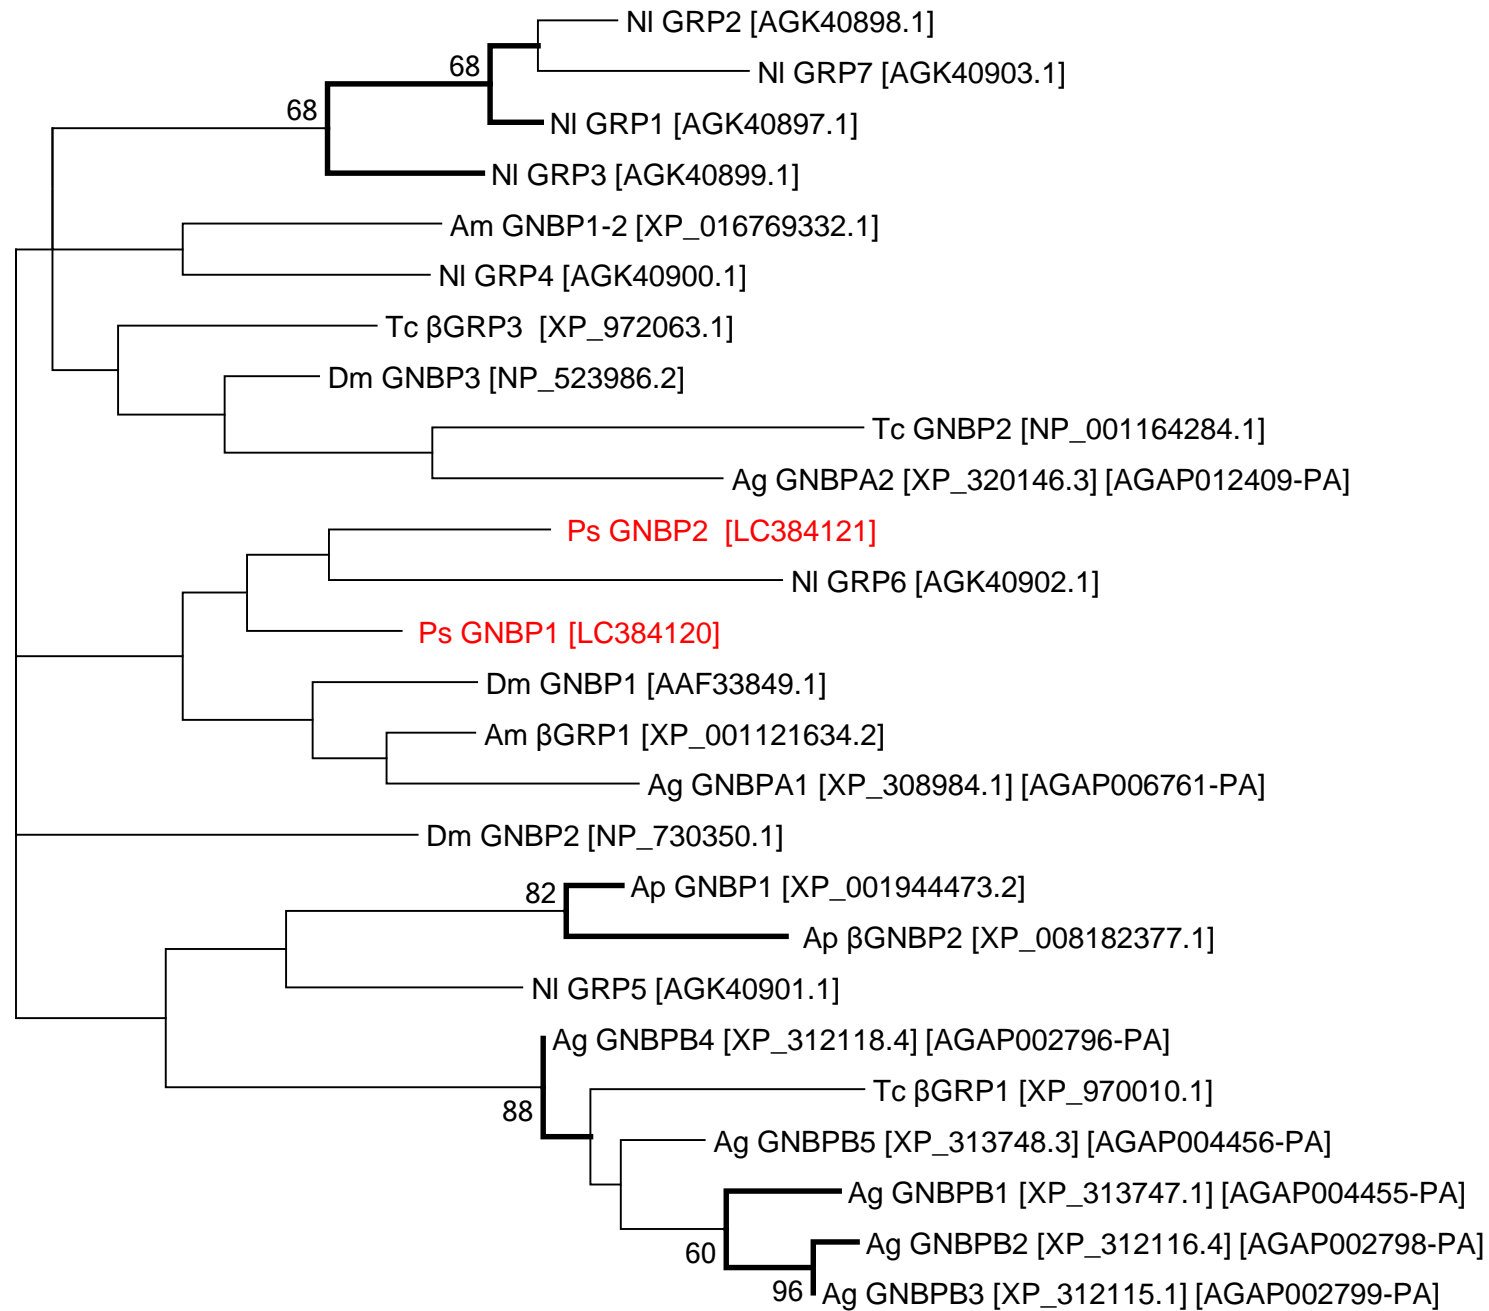

0.20

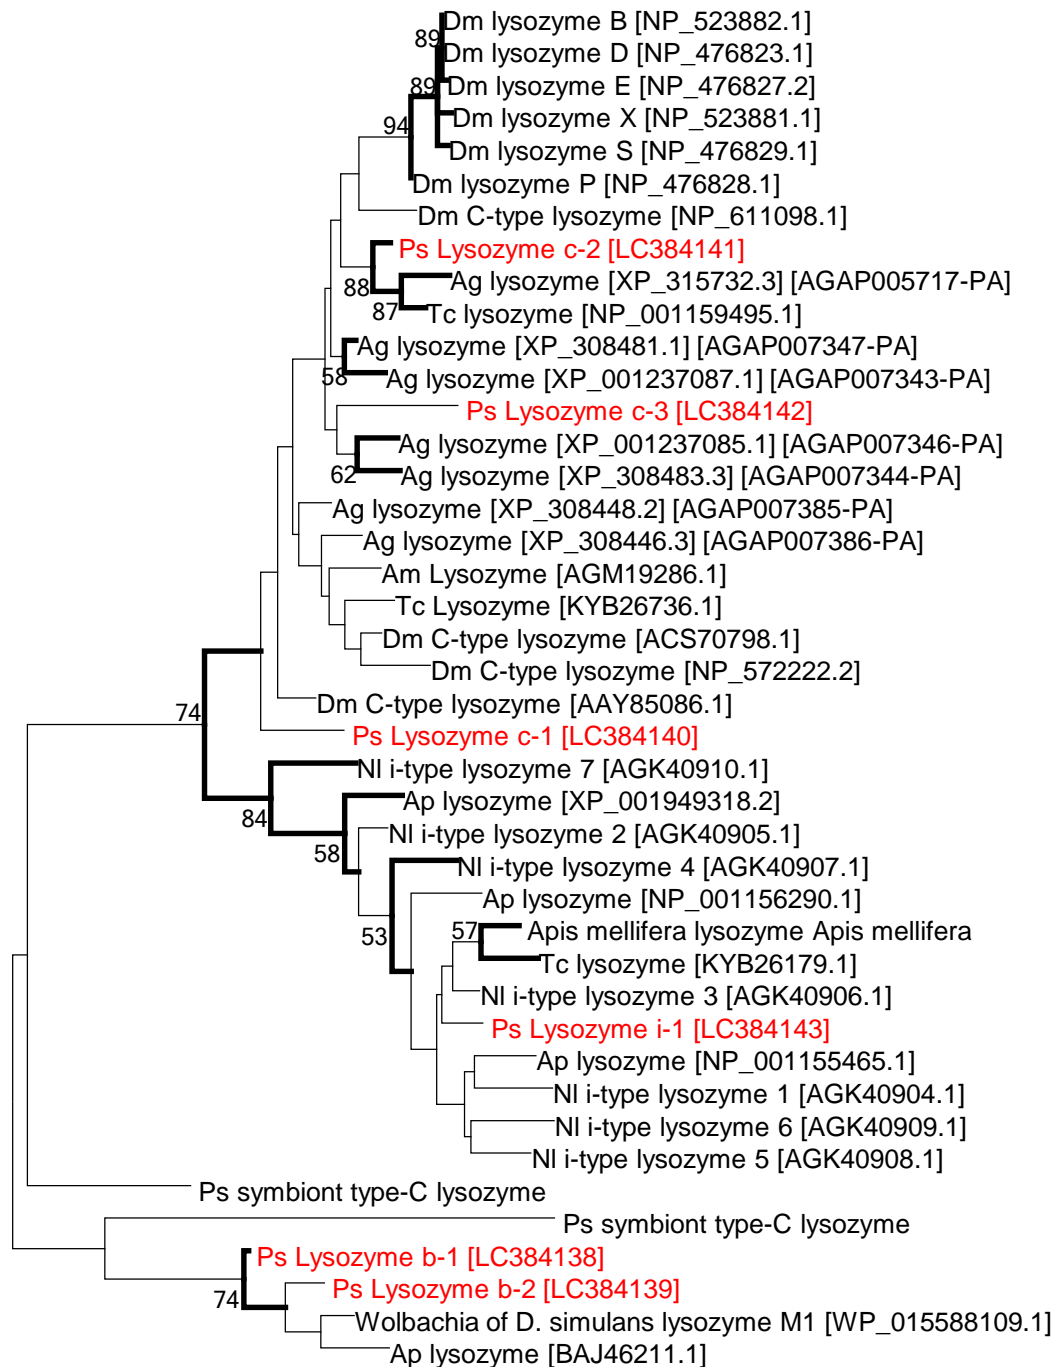

C-type

i-type

bacterial-type

0.50

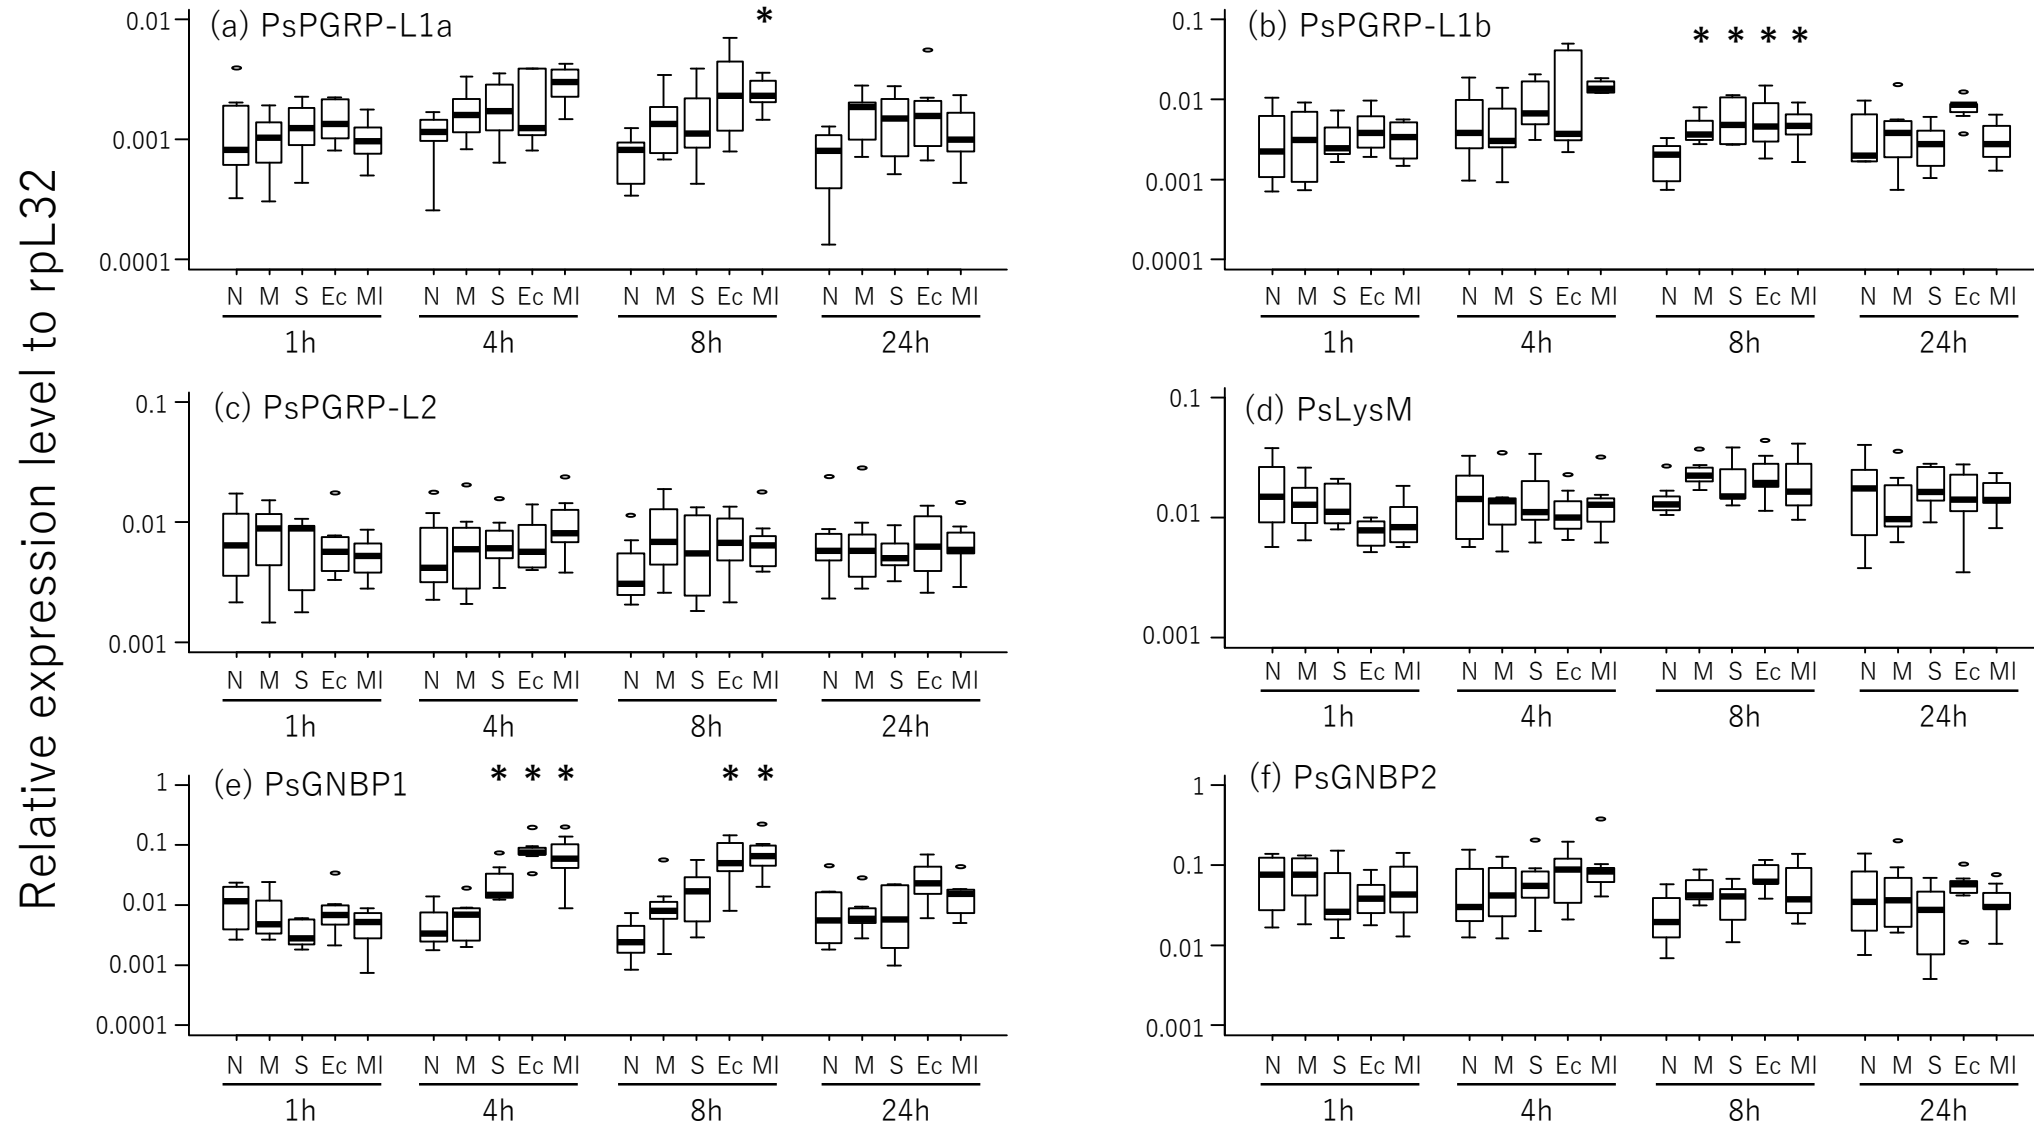



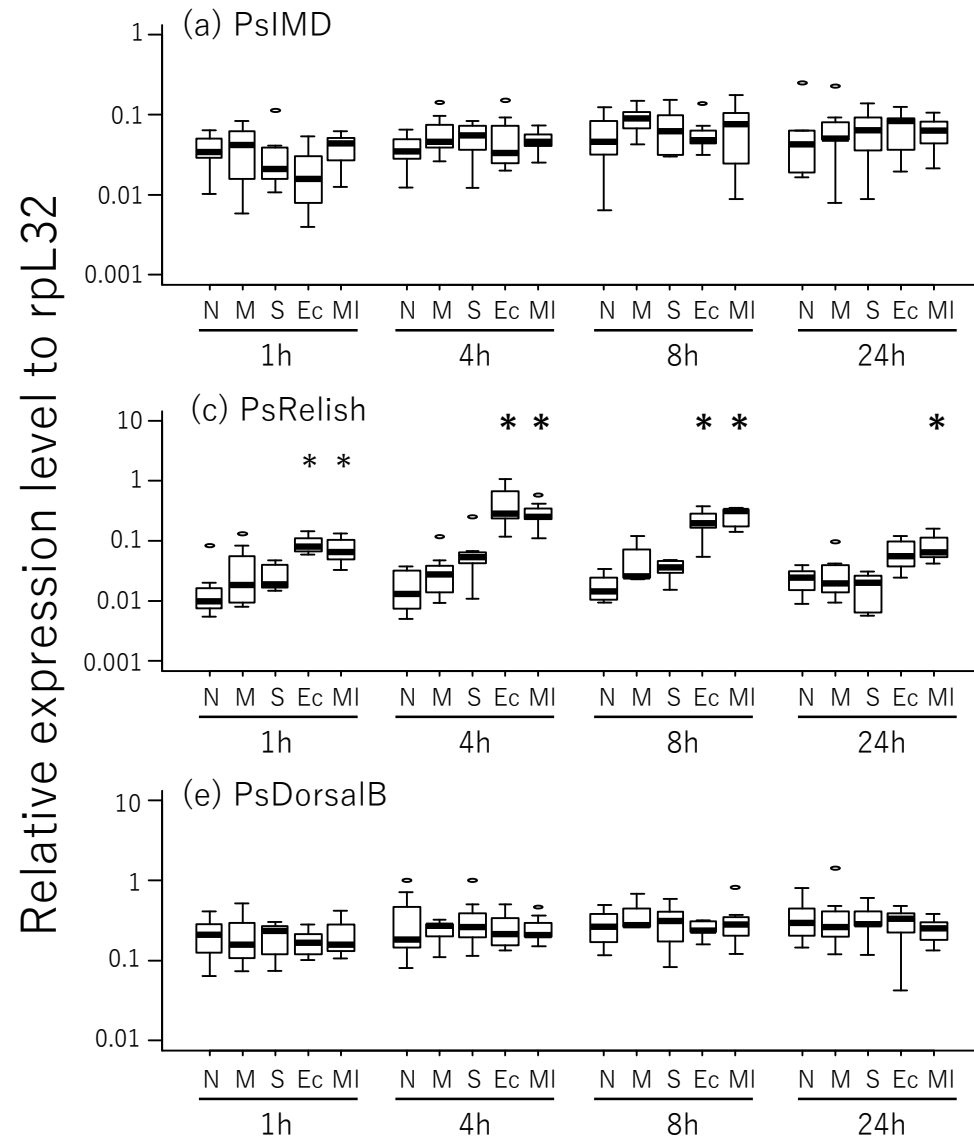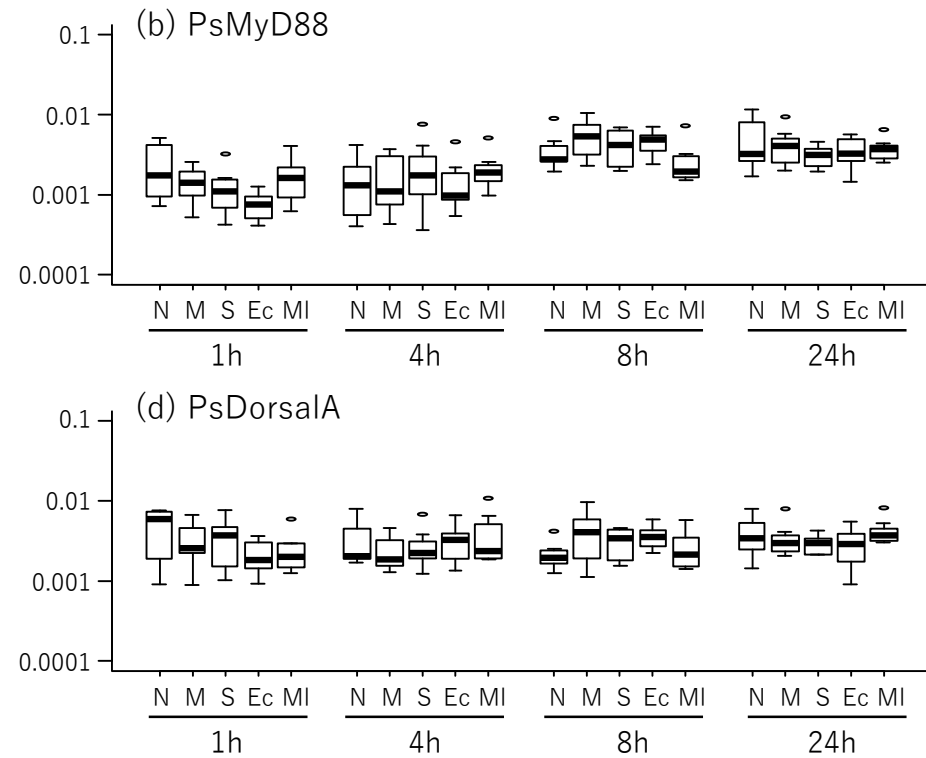

Relative expression level to rpL32

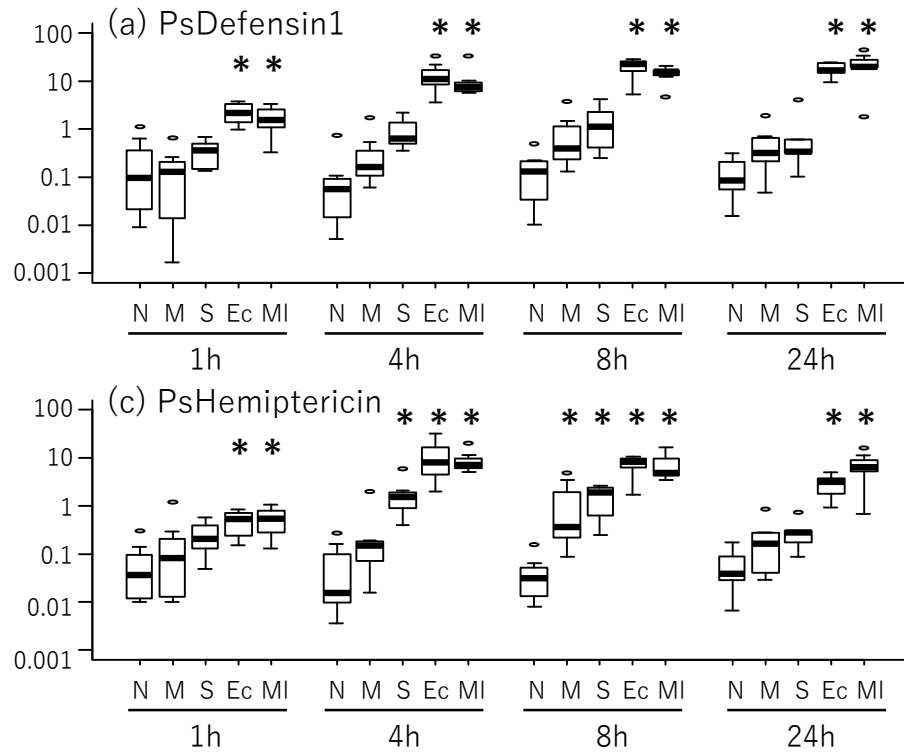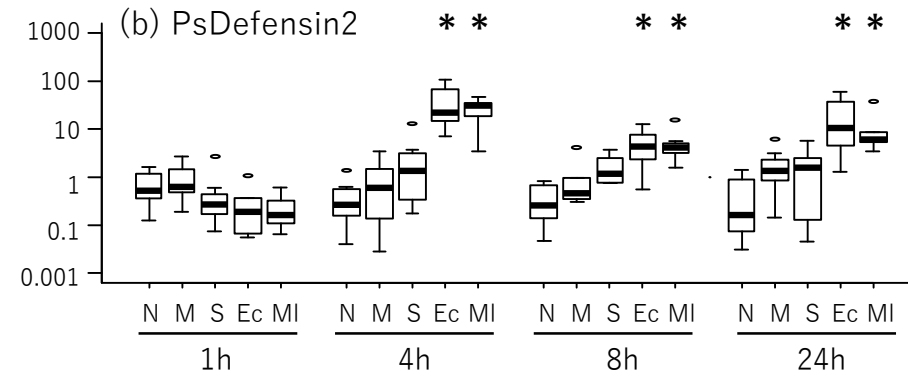

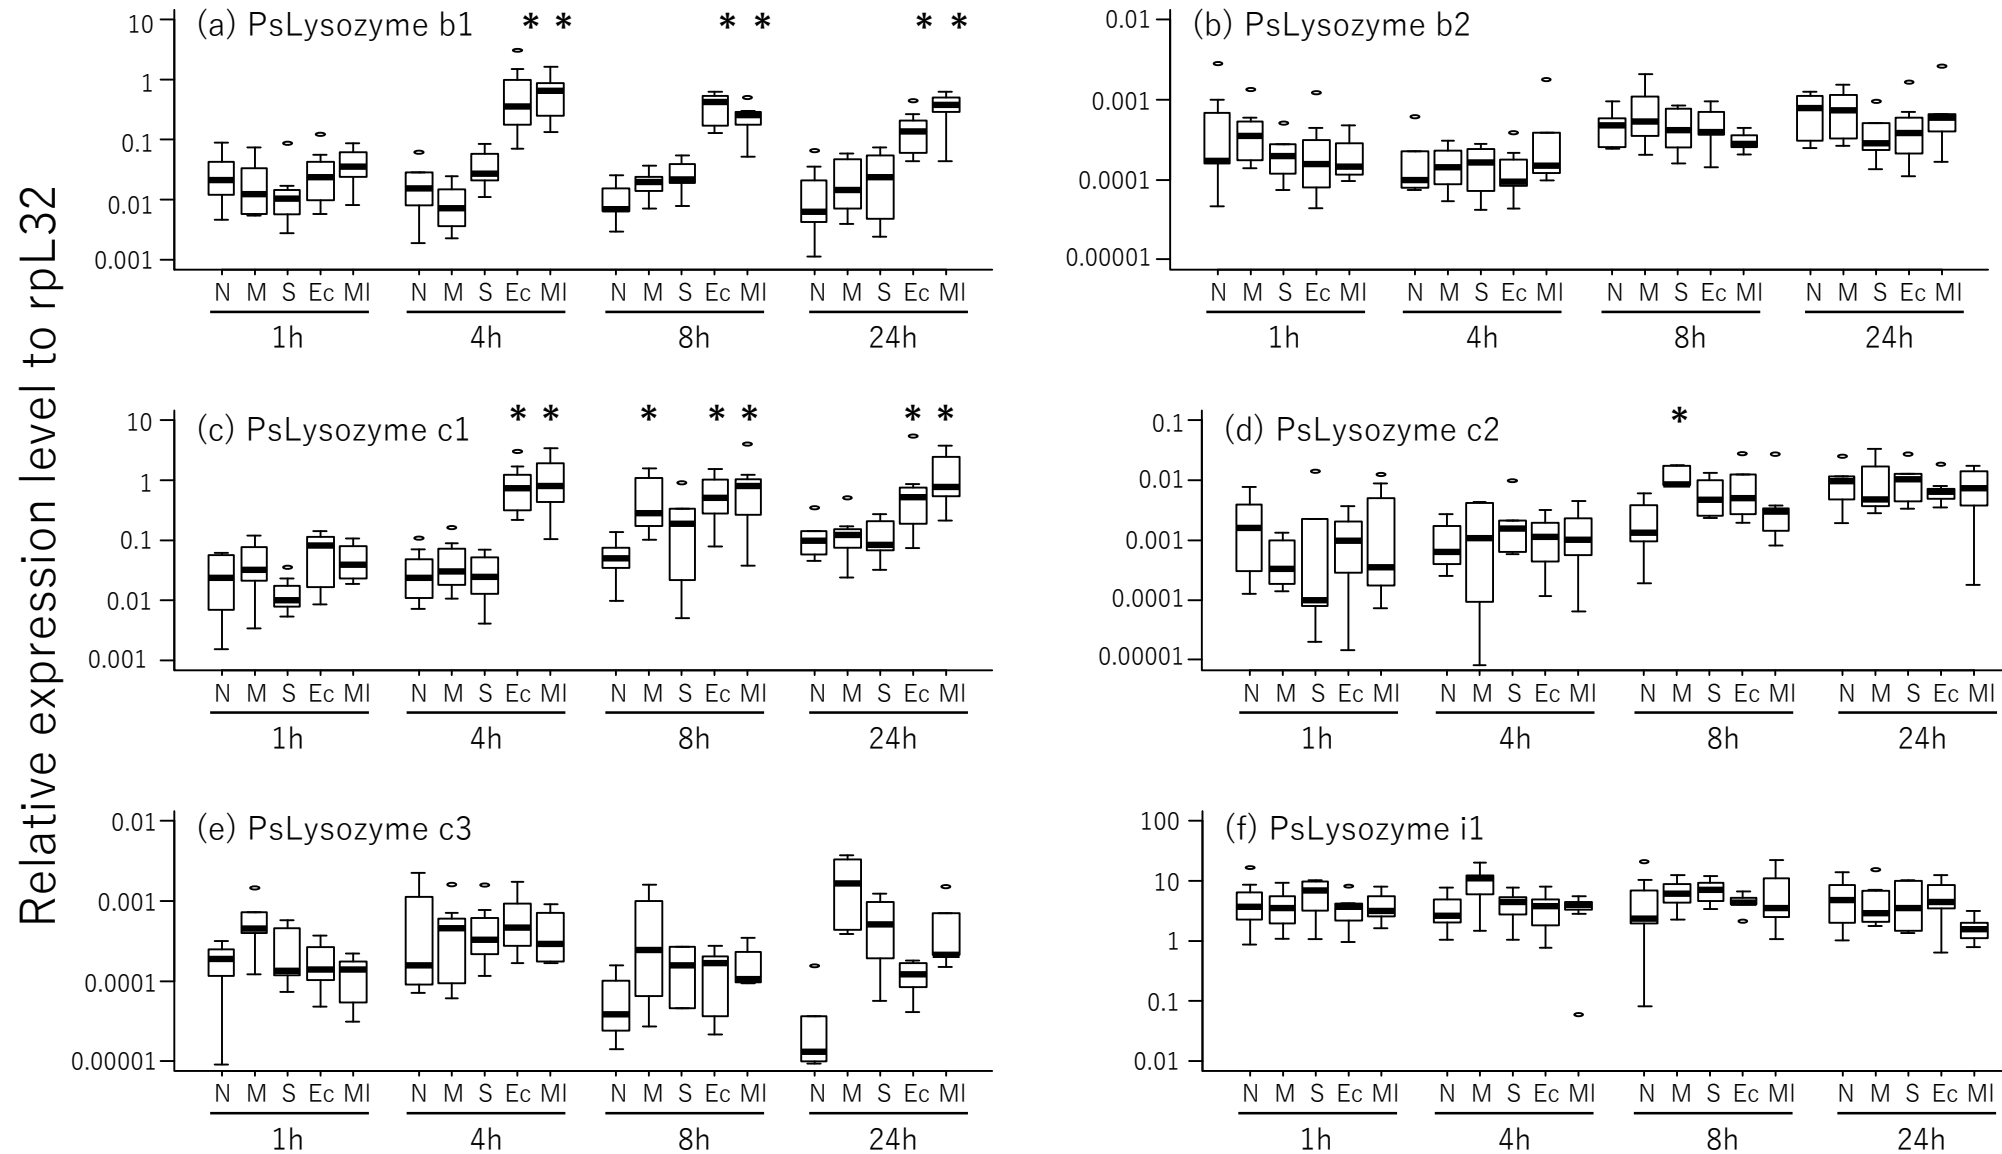

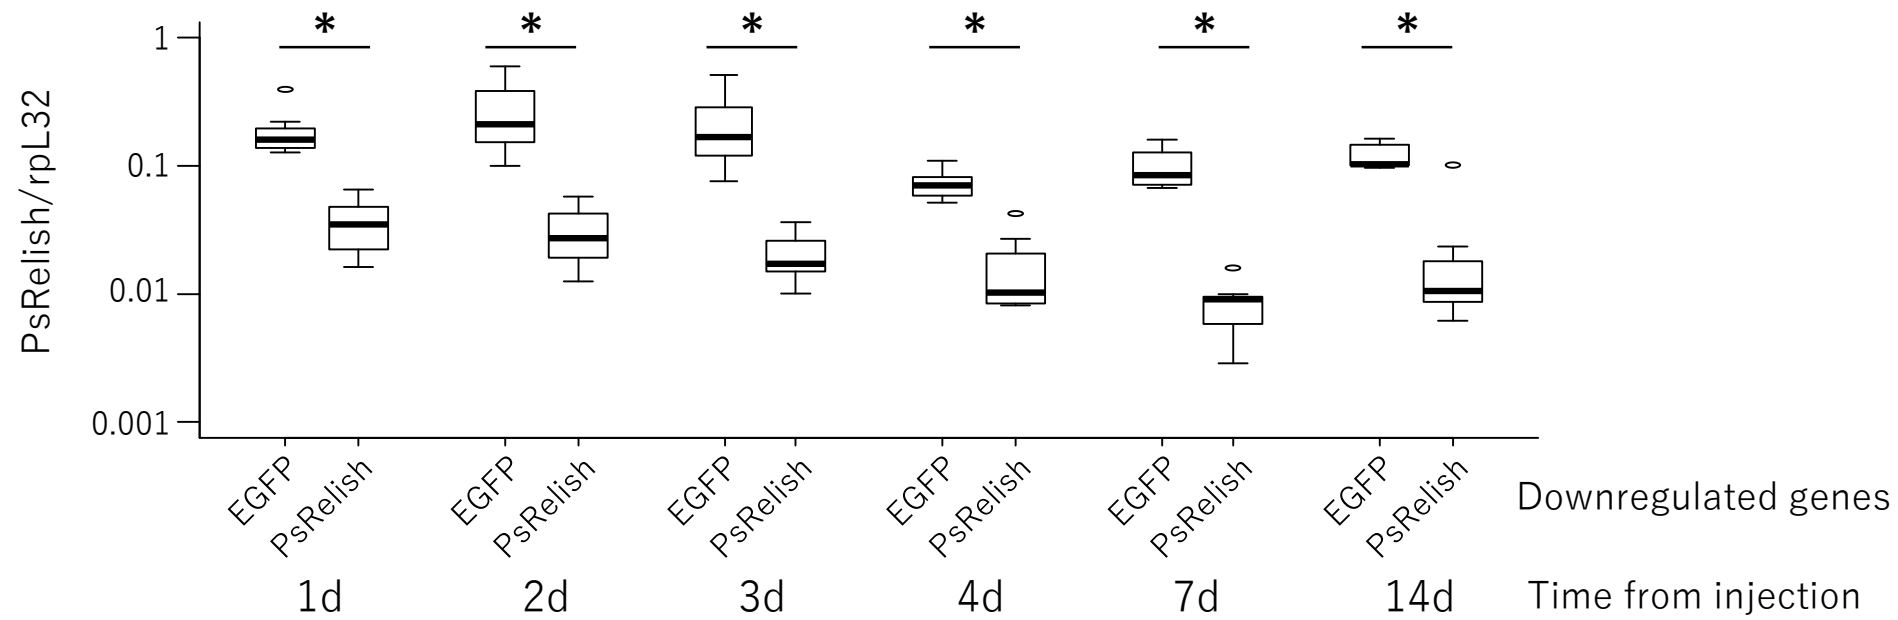

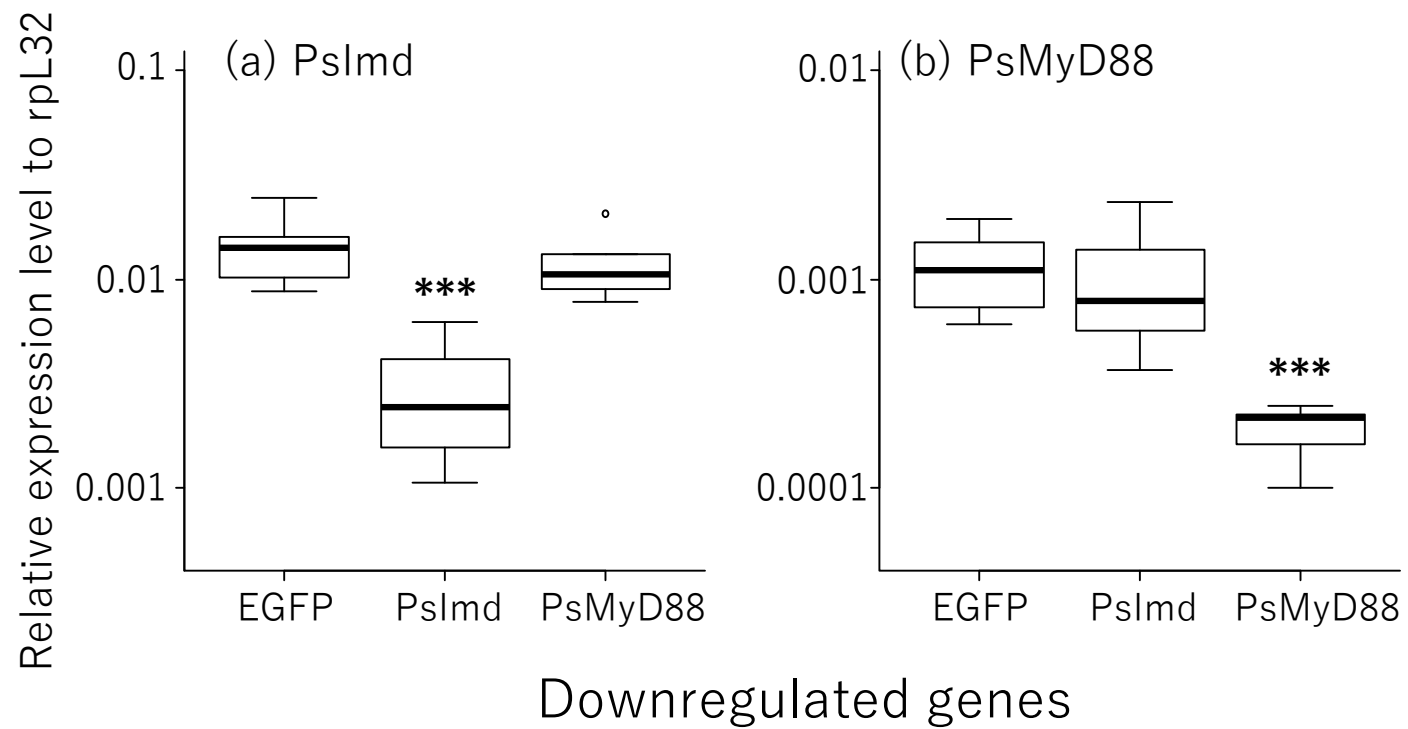

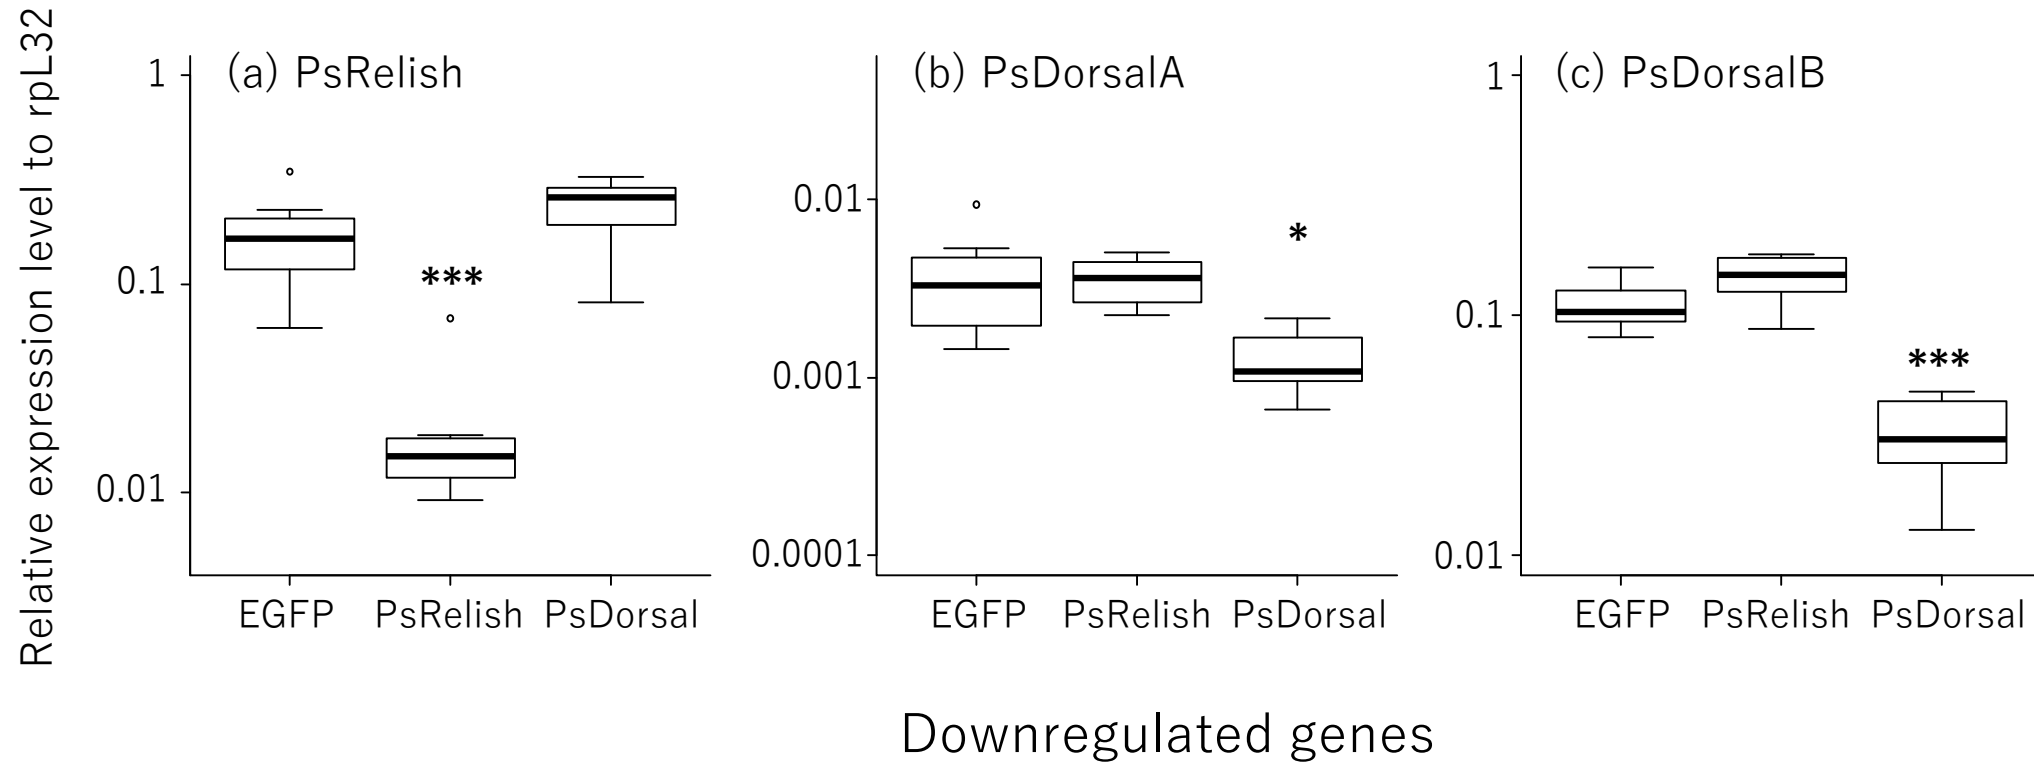

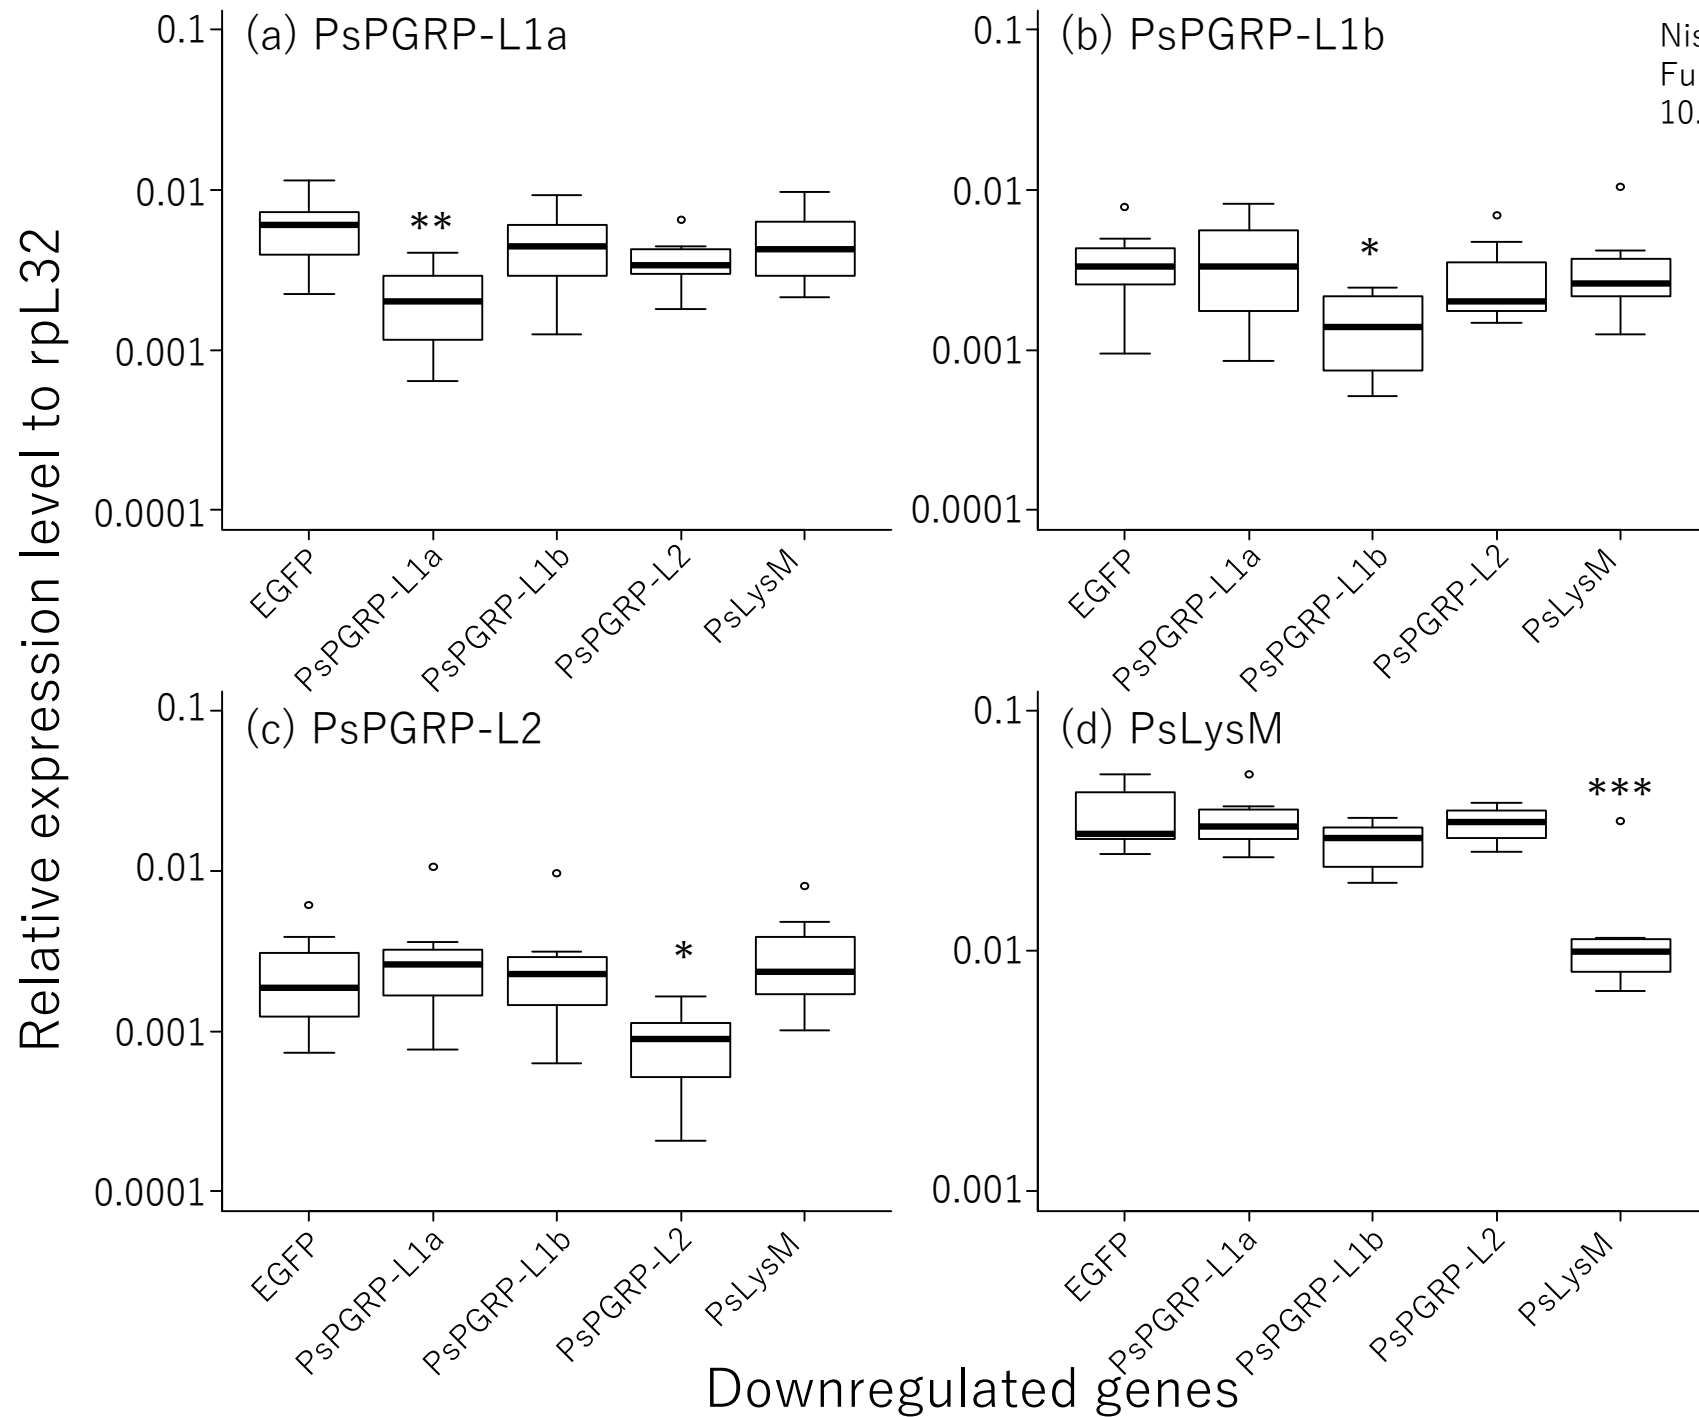

Nishide et al.  
Functional crosstalk across IMD and Toll pathways  
10.1098/rspb.

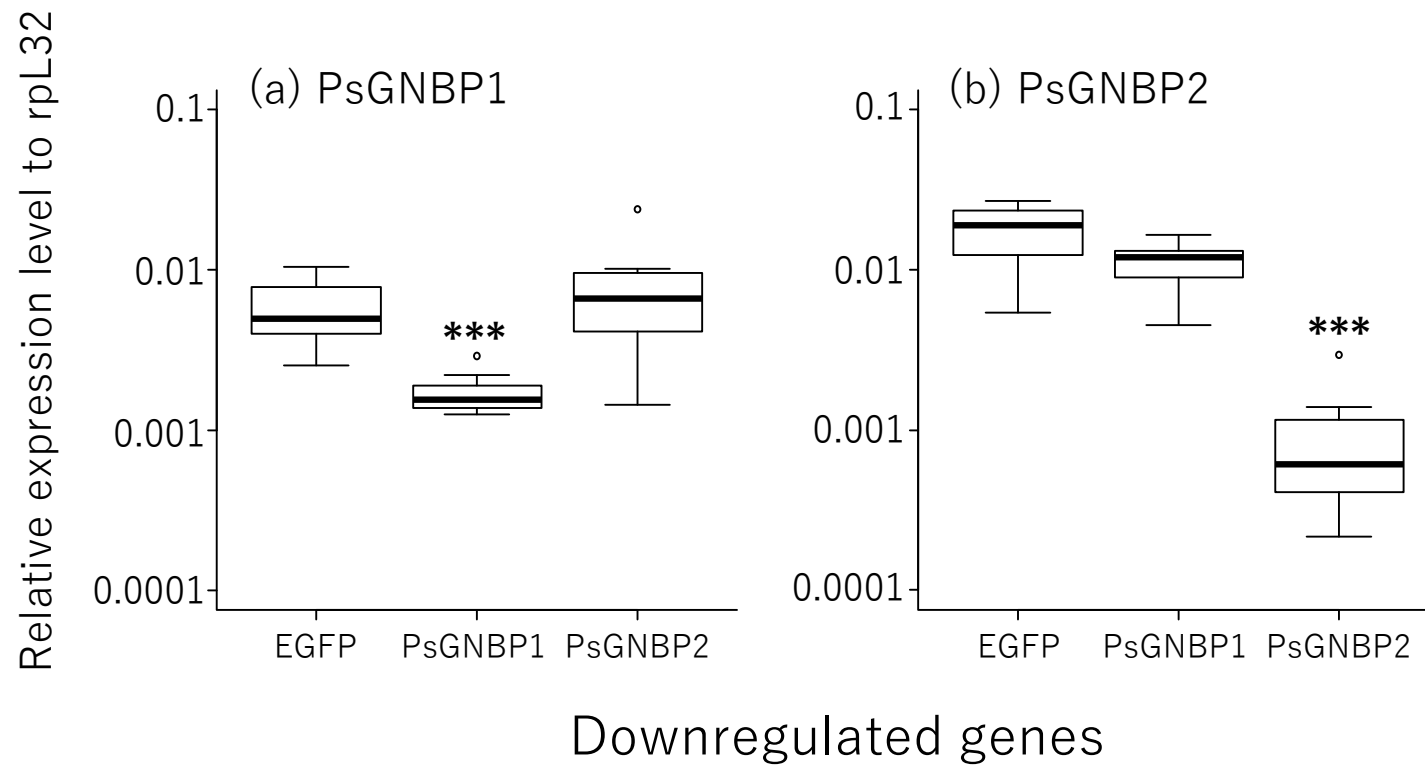

Supplement: rspb20182207supp1.pdf [file rspb20182207supp1.pdf]
